# Supplementary material for: Pathological changes of distal motor neurons after complete spinal cord injury
Source: PubMed Central journal article supplement (PMC6327522; doi:10.1186/s13041-018-0422-3), 2019-01-09

**A****Kinesin superfamily proteins (KIFs)**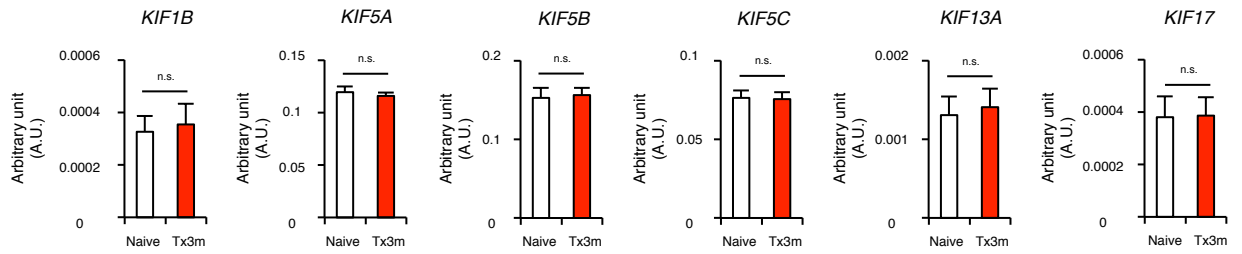

Supplement: 13041_2018_422_MOESM3_ESM.pdf [file 13041_2018_422_MOESM3_ESM.pdf]
